# Supplementary material
Source: PubMed Central journal article supplement (PMC6929390)
Supplement: baADV2019000647-suppl1.pdf [file baADV2019000647-suppl1.pdf]

## Supplemental data 1

### Data collection

Data were collected from the French BPDCN network and the *Société Francophone de Greffe de Moelle et de Thérapie Cellulaire* (SFGM-TC) registries. Collection ended on 1 March 2016. Both databases were cross-checked, and data were verified with additional items directly collected in each center using a dedicated, predefined case report form.

Variables recorded in the database included: demographics, date of initial diagnosis, clinical and biological characteristics at diagnosis, type of primary chemotherapy, disease status at completion of primary treatment, date and type of HSCT, date and type of treatments after relapse, disease status at last contact, and date of last contact or death. Data were missing for 7 cases for blood cell count and for 13 cases for myelogram. Anatomopathology analysis is not described since we focus on data obtained in hematology laboratory.

The study was approved by the local ethics committee (CPP Est II) and the Advisory Committee for Data Processing in Health Research.

### Patients

For all cases but 3, diagnosis was confirmed by local histopathology and immunohistochemistry analyses of infiltrated tissues (skin, bone marrow or lymph node) or by flow cytometry using specific pDC markers as described (5). For the remaining 3 cases, the diagnosis was retained by physicians based on the presence of cutaneous lesions, expression of CD4 and CD56 without expression of specific lineage markers (MPO<sup>-</sup>, CD14<sup>-</sup>, cCD3<sup>-</sup>, cCD79a<sup>-</sup> and CD19<sup>-</sup>).

## Flow cytometry: Markers used to characterize BPDCN patients.

| markers                          | fluorochrome  | provider        | reference   |
|----------------------------------|---------------|-----------------|-------------|
| CD45                             | V500          | BDPharmingén    | 560777      |
| <b>T lineage</b>                 |               |                 |             |
| CD2                              | FITC          | Beckman Coulter | A07743      |
| CD3                              | AF750         | Beckman Coulter | A94680      |
| cCD3                             | APC           | Beckman Coulter | IM2467      |
| CD5                              | FITC          | Beckman Coulter | A08932      |
| CD7                              | V450          | BDPharmingén    | 642916      |
| CD8                              | AF750         | Beckman Coulter | A94683      |
| CD45 RA                          | AF750         | Beckman Coulter | A86050      |
| CD45RO                           | PC7           | BDPharmingén    | 337168      |
| CD1a                             | PE            | Beckman Coulter | A07742      |
| <b>myeloid lineage</b>           |               |                 |             |
| CD13                             | PE            | BDPharmingén    | 34746       |
| CD14                             | APC-H7        | BDPharmingén    | 641394      |
| CD15                             | FITC          | BDPharmingén    | IM1423U     |
| CD65                             | FITC          | BDPharmingén    | IM1654U     |
| CD33                             | PERCP CY5.5   | Beckman Coulter | 333146      |
| CD36                             | FITC          | BDPharmingén    | 555454      |
| CD64                             | PC5           | Beckman Coulter | IM3606U     |
| CD117                            | APC           | BDPharmingén    | 333233      |
| cCD13                            | PE            | BDPharmingén    | 34746       |
| cMPO                             | FITC          | Dako            | F0714       |
| <b>B lineage</b>                 |               |                 |             |
| CD19                             | APC           | Beckman Coulter | A07769      |
| CD20                             | V450          | BDPharmingén    | 655872      |
| CD10                             | APC           | Beckman Coulter | IM3633      |
| CD22                             | PERCP CY5.5   | BDPharmingén    | 563942      |
| CD57                             | FITC          | BDPharmingén    | 555619      |
| cCD79a                           | PE            | Dako            | R7159       |
| cCD22                            | PERCP-VIO-700 | Miltenyi        | 130-111-528 |
| <b>pDC markers</b>               |               |                 |             |
| CD4                              | APC-H7        | BDPharmingén    | 560158      |
| CD56                             | V450          | BDPharmingén    | 560360      |
| CD123                            | PE-CY7        | Biologend       | 306010      |
| HLADR                            | FITC          | BDPharmingén    | 555811      |
| CD303                            | FITC          | Miltenyi        | 130-090-510 |
| CD304                            | PE            | Miltenyi        | 130-090-533 |
| cTCL1                            | PE            | Affymetrix      | 12-6699-73  |
| FCER1                            | APC           | Affymetrix      | 17-5899-42  |
| ILT7                             | APC           | Affymetrix      | 17-517942   |
| <b>conventional DC markers</b>   |               |                 |             |
| CD11c                            | PERCP CY5.5   | BDPharmingén    | 658330      |
| BDCA1                            | PE            | Miltenyi        | 130-090-508 |
| BDCA3                            | APC           | Miltenyi        | 130-090-907 |
| <b>immaturity/others markers</b> |               |                 |             |
| CD34                             | V450          | BDPharmingén    | 345804      |
| CD38                             | APC           | BDPharmingén    | 345807      |
| CD133                            | PE            | Miltenyi        | 130-080-801 |
| CD10                             | FITC          | Beckman Coulter | A07759      |
| TdT                              | FITC          | Dako            | F7139       |
